# Supplementary material
Source: publisher figshare collection journal article supplement (https://gsajournals.figshare.com/articles/dataset/_/16574828)
Supplement: Supplementary file 3 [file 1]

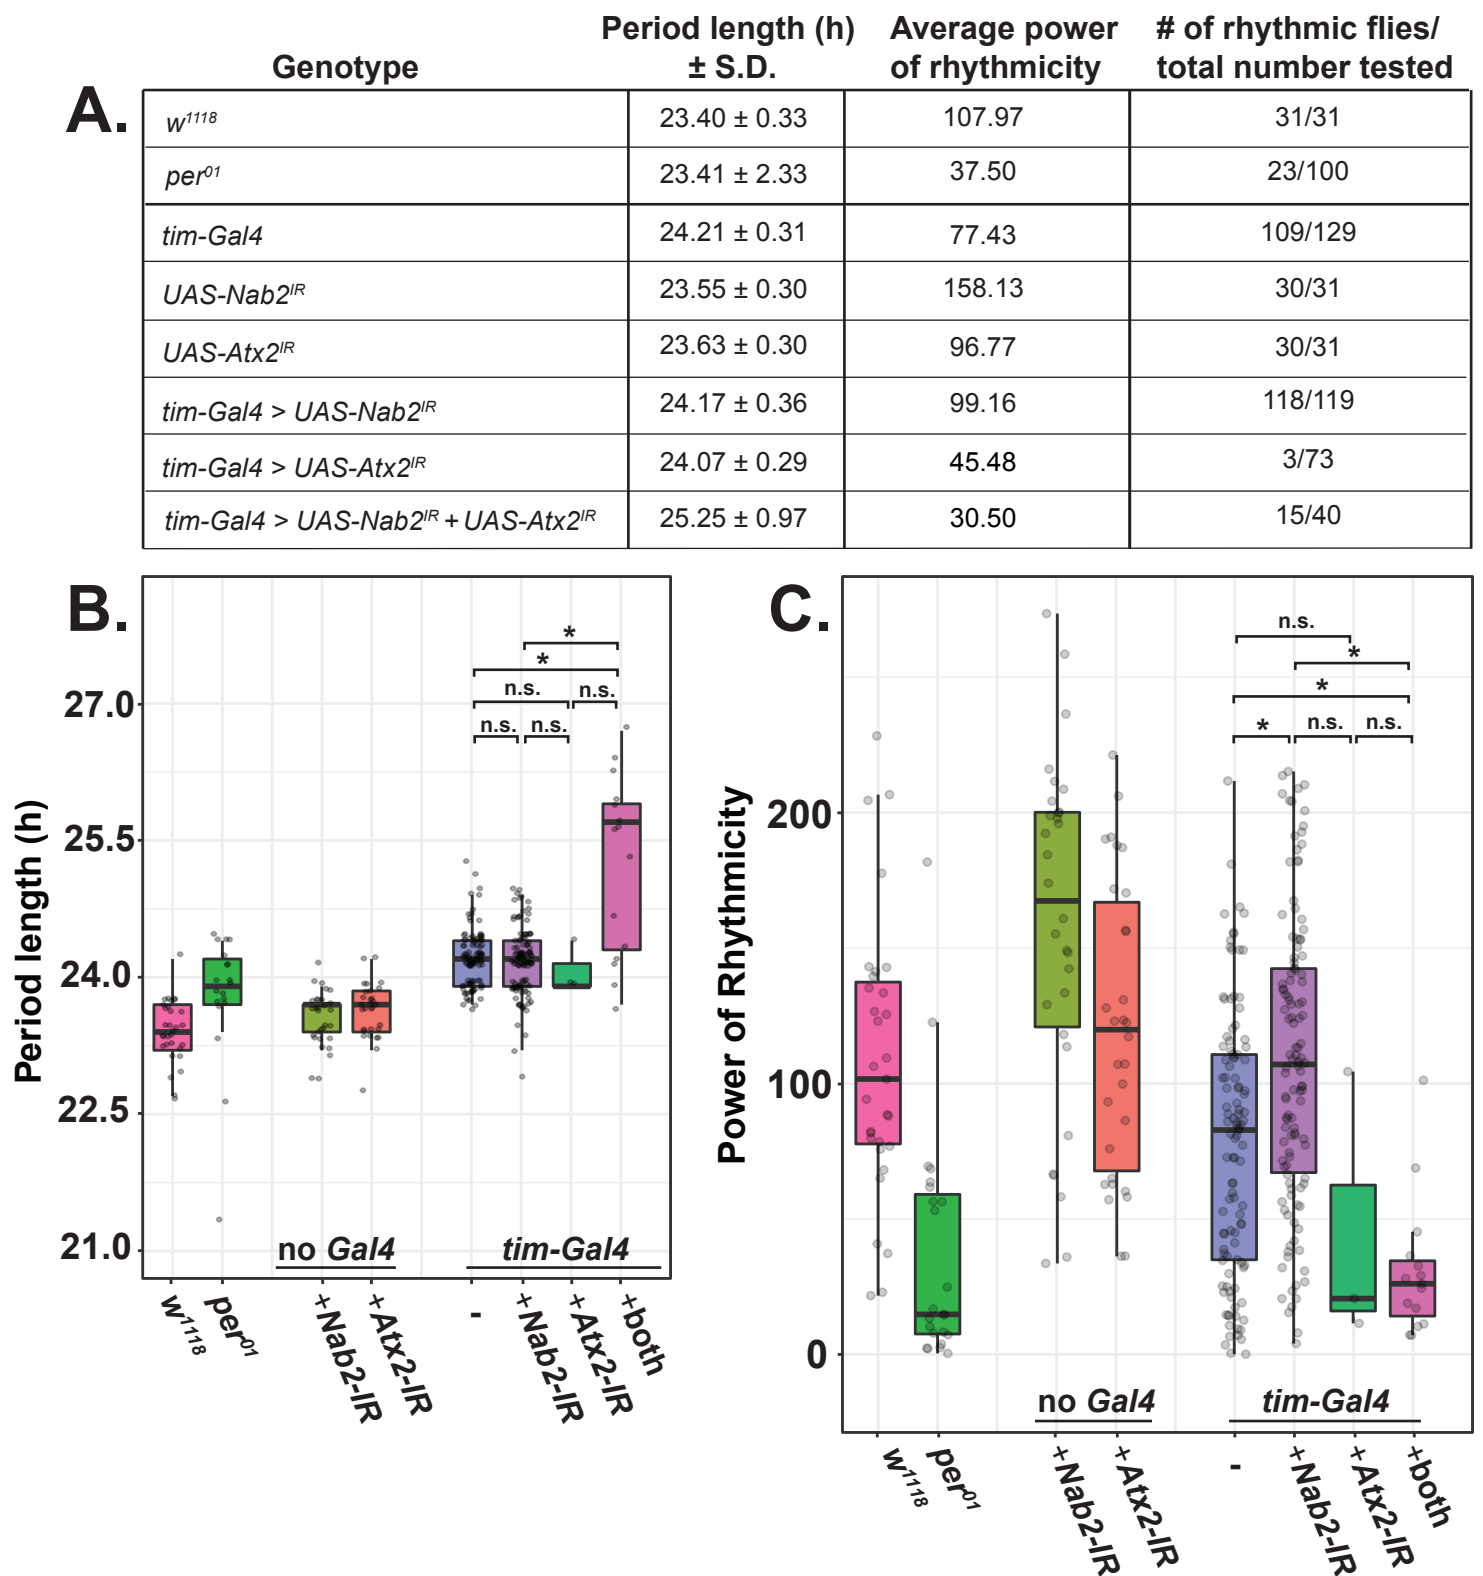

**Figure S1: (Associated with Figure 3) Period length and power of rhythmicity of flies with RNAi depletion of Nab2, Atx2, or both RBPs in circadian neurons.** (A) Free-running circadian period length, average power of rhythmicity, and rhythmic number were calculated using chi-squared periodograms and the Rethomics R package (GEISMANN, 2019). Only data from seven 24-hour dark periods was used to calculate circadian parameters. (B) Box and whisker plots showing median period length (hours), interquartile range, and min/max for each genotype. Data points for each of the selected genotypes are also plotted. Decreased expression of both *Nab2* and *Atx2* in circadian neurons significantly extended period length compared to *tim-Gal4*, *UAS-Nab2<sup>IR</sup>*, or *UAS-Atx2<sup>IR</sup>* flies alone. (C) Box and whisker plots showing median power measurements, interquartile range, and min/max for each genotype. Data points for each of the selected genotypes are also plotted. The power of rhythmicity was significantly decreased for flies lacking both *Nab2* and *Atx2* in circadian neurons compared to *tim-Gal4* controls. The period length and power data was analyzed using non-parametric Kruskal Wallis tests and pairwise Wilcoxon Rank Sum tests with Bonferroni corrections for multiple comparisons (\* =  $p < 0.01$ , n.s. = non significant).
