# Supplementary material
Source: publisher figshare collection journal article supplement (https://gsajournals.figshare.com/articles/dataset/_/16574828)
Supplement: Supplementary file 4 [file 1]

## Basigin (*Bsg*)

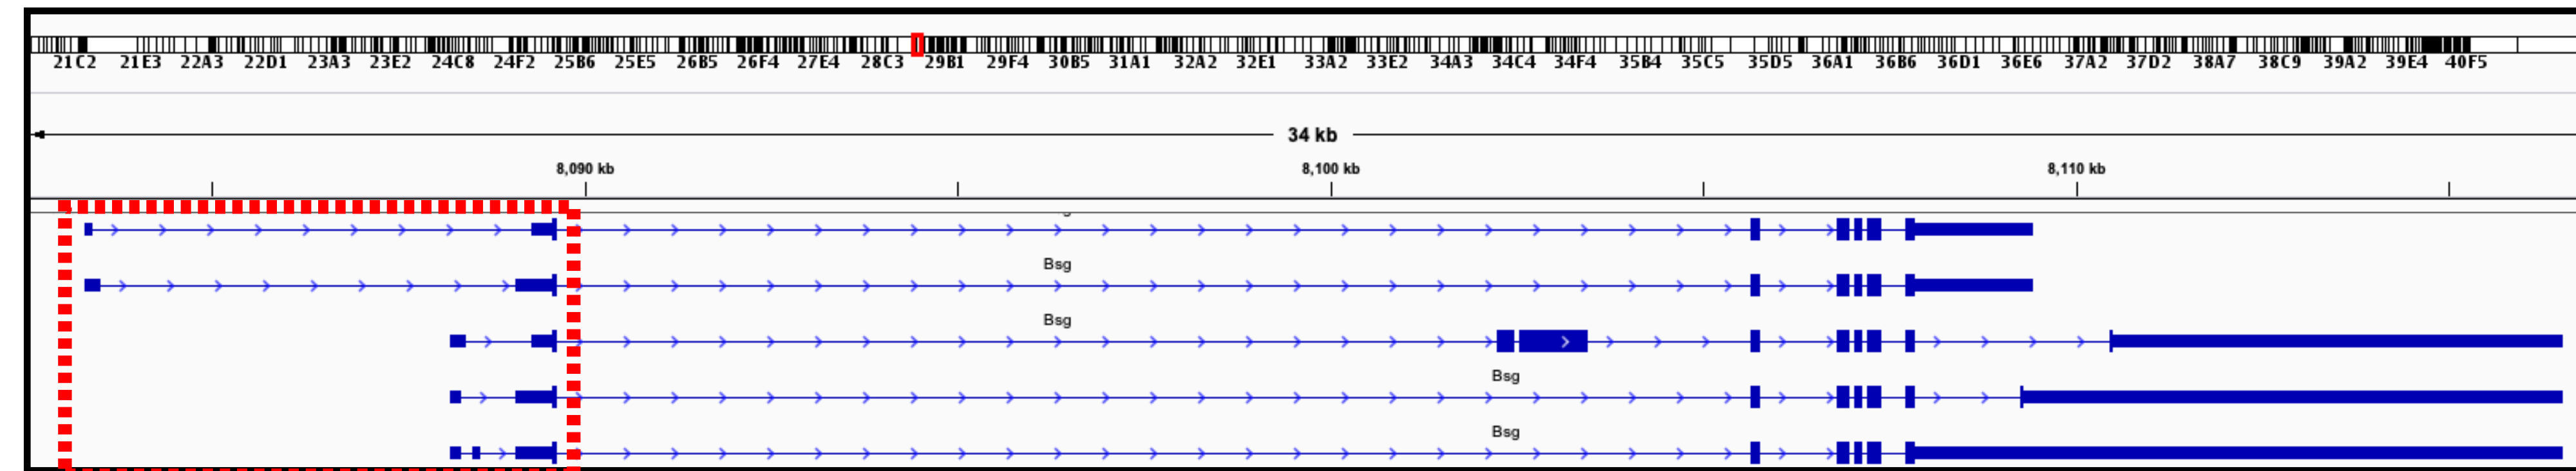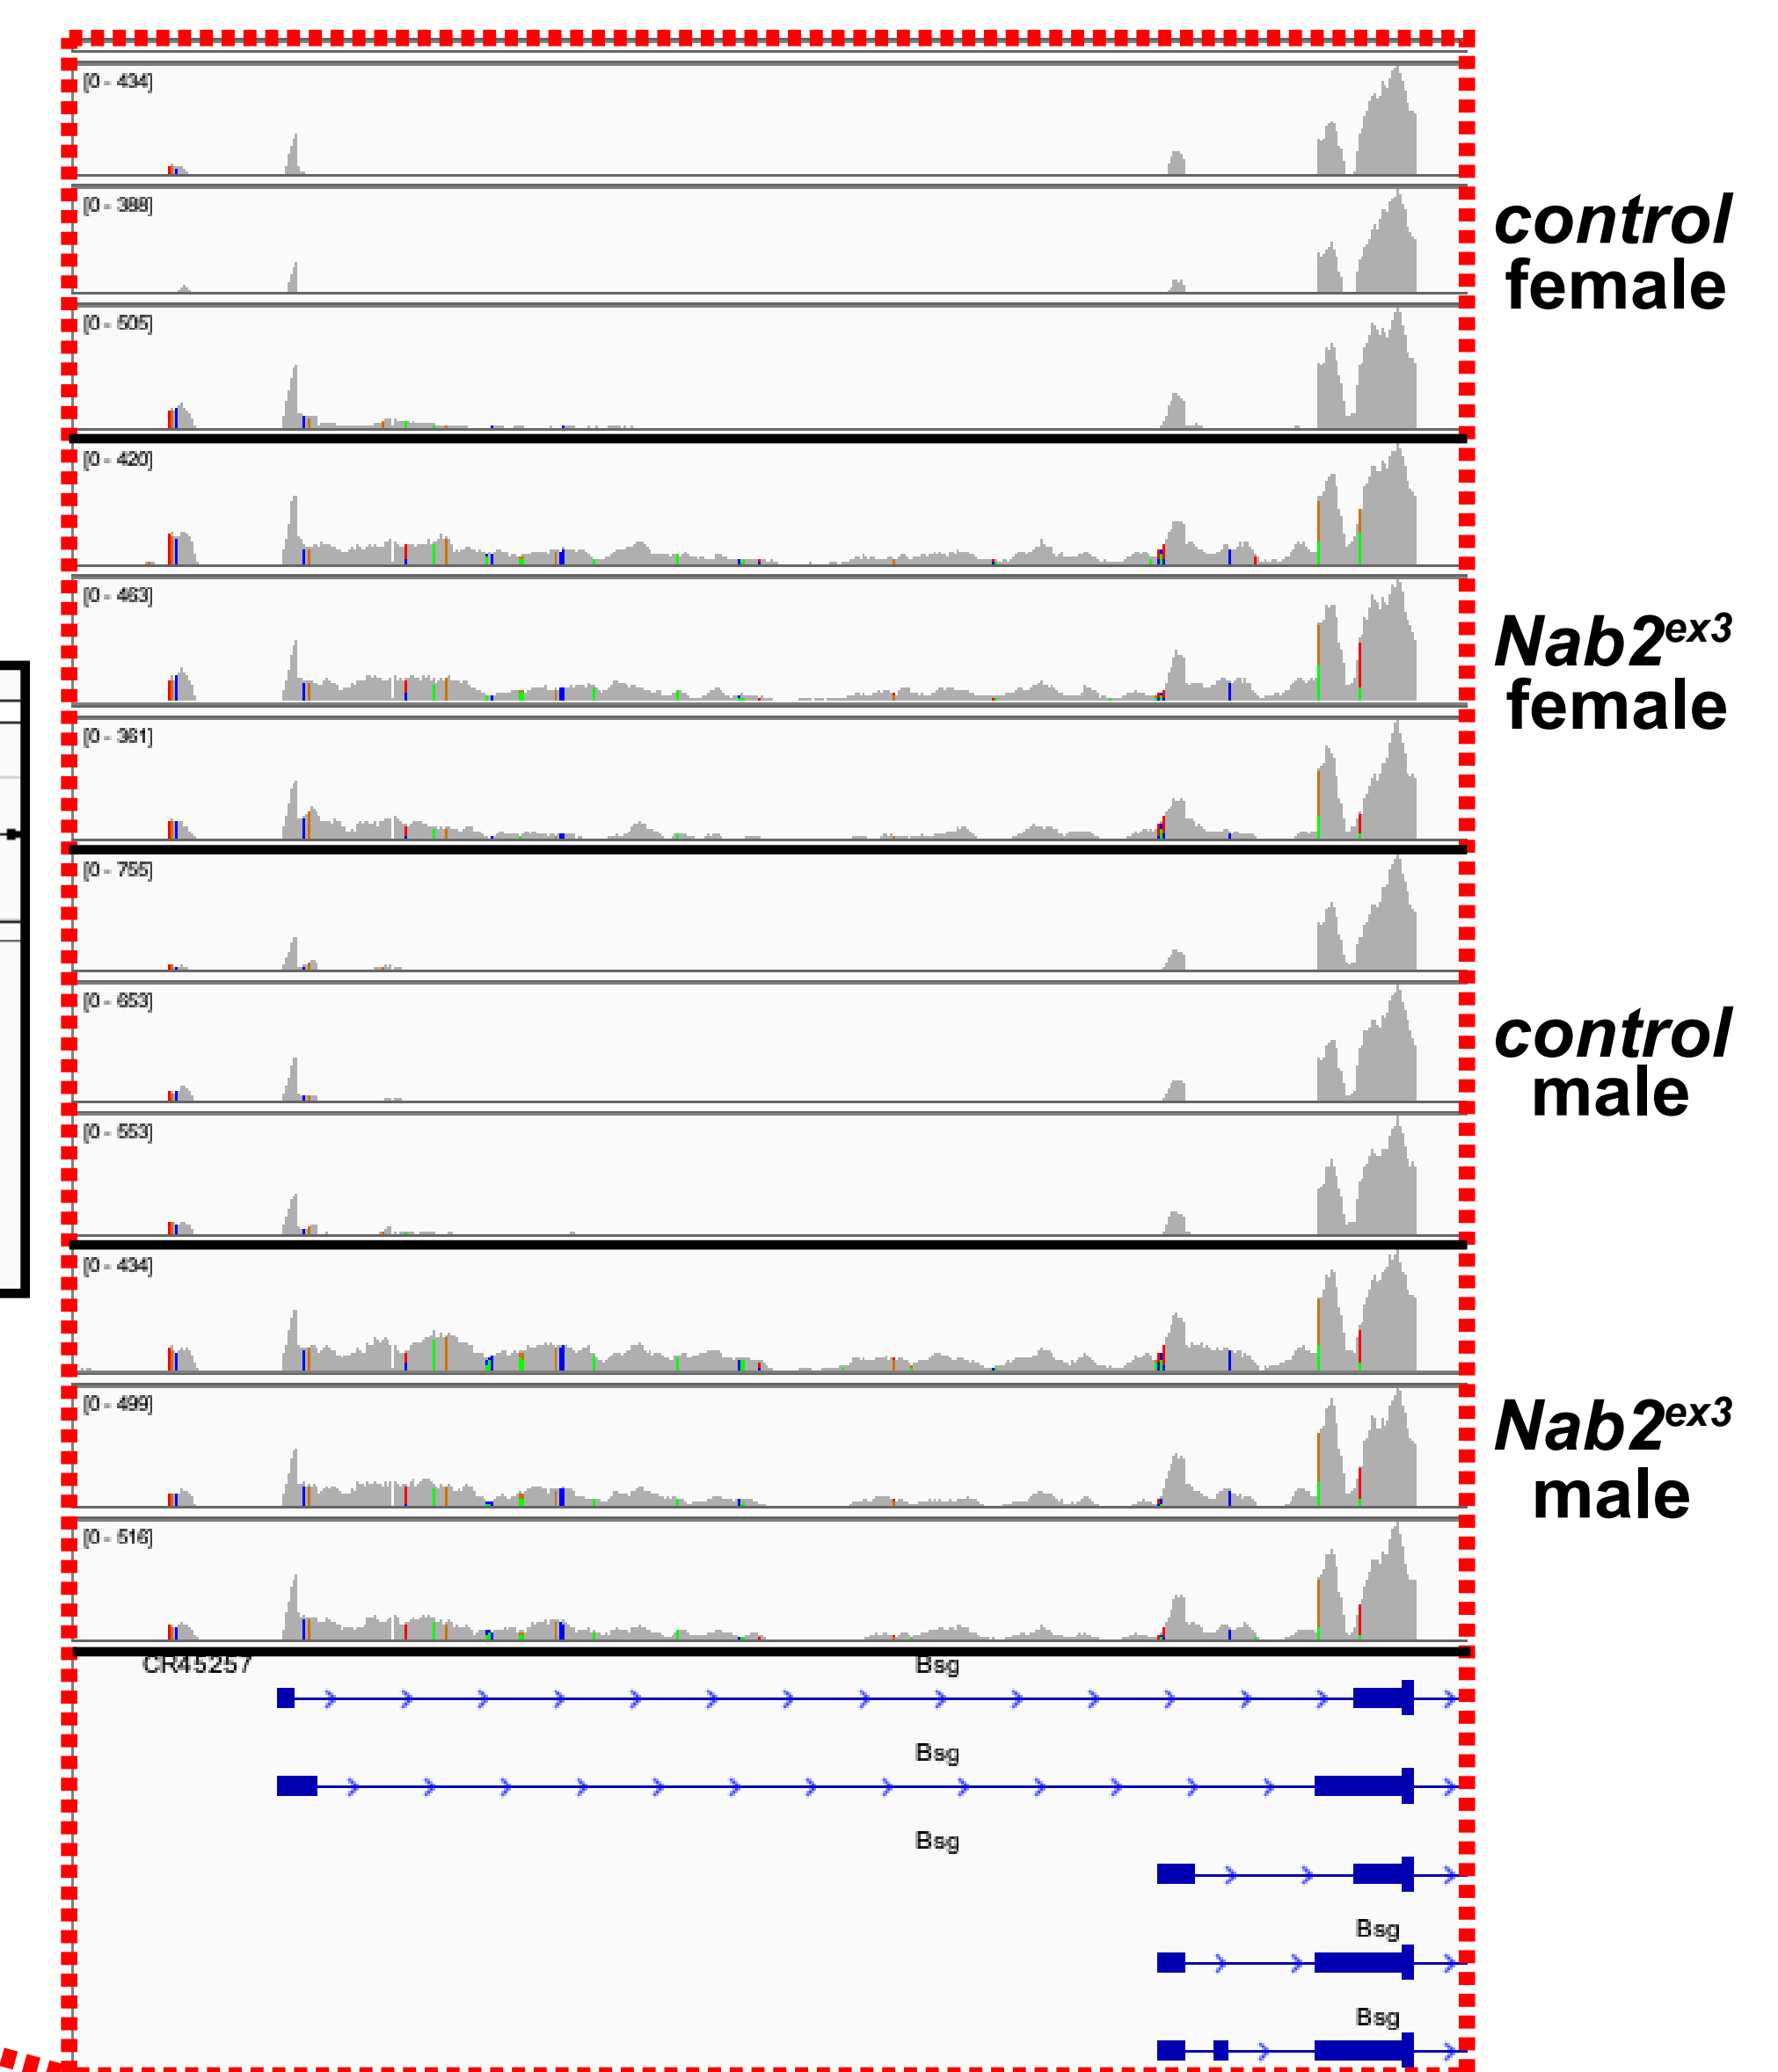

## stathmin (*stai*)

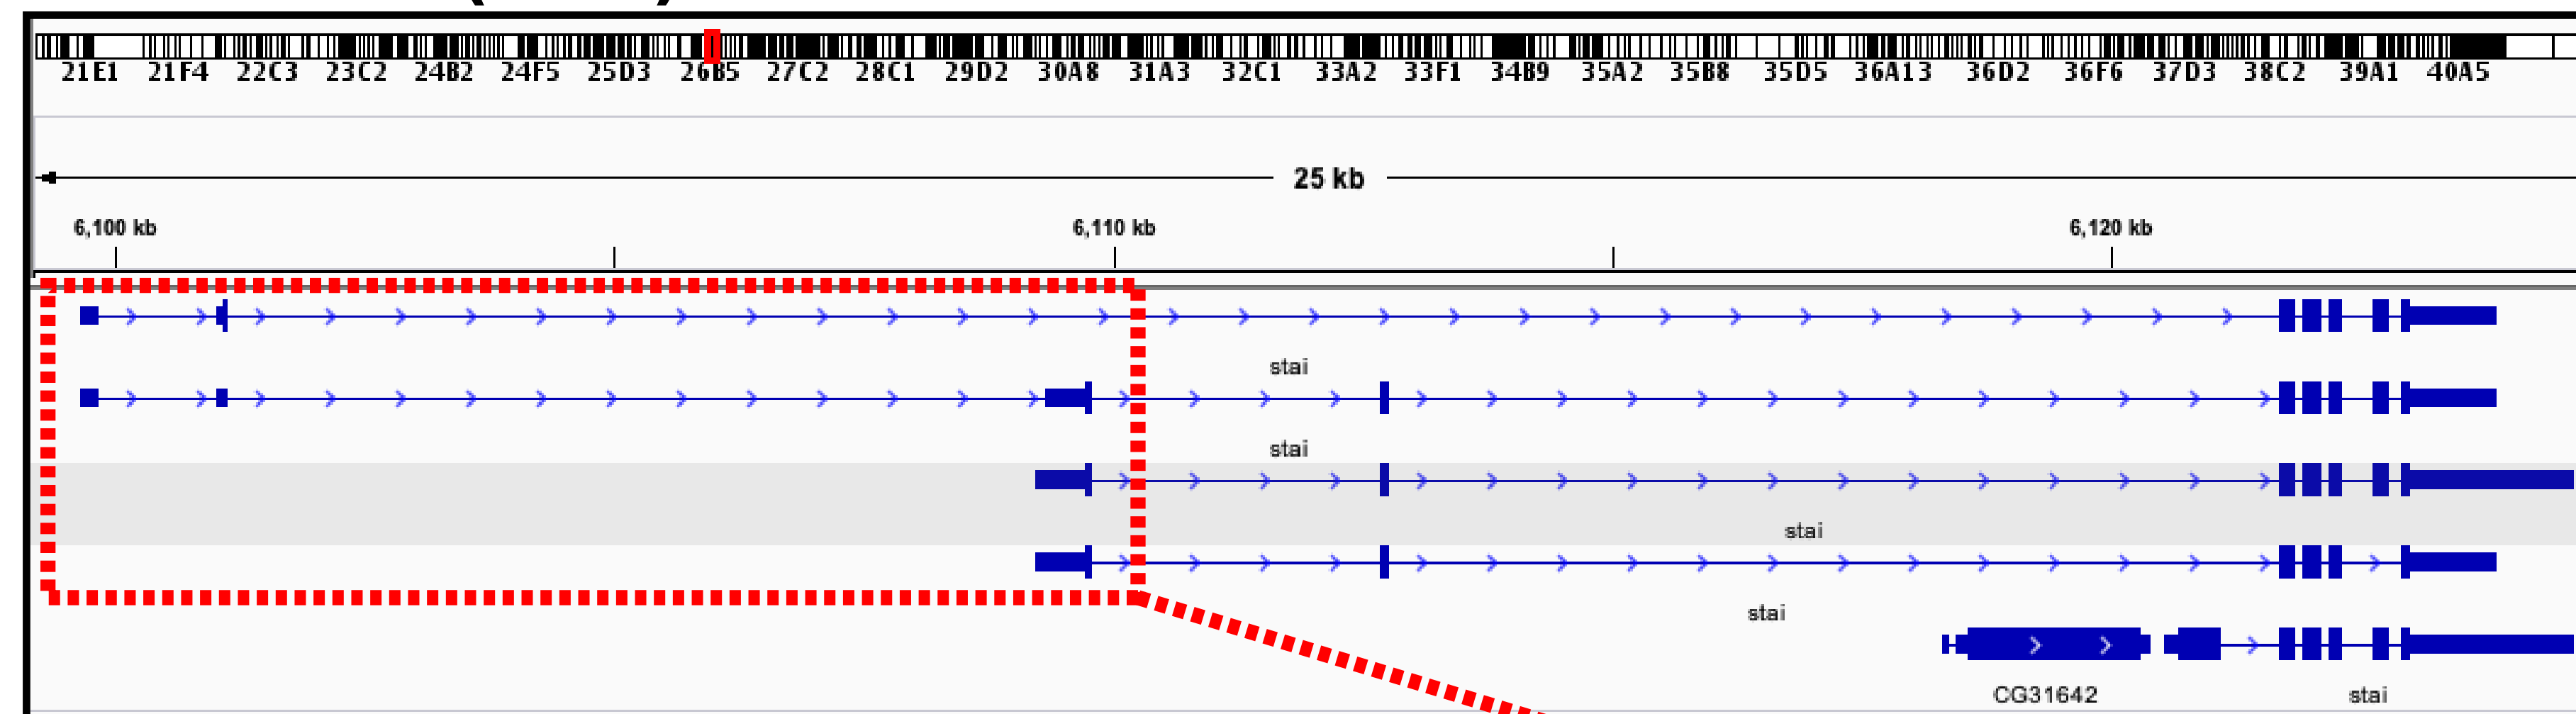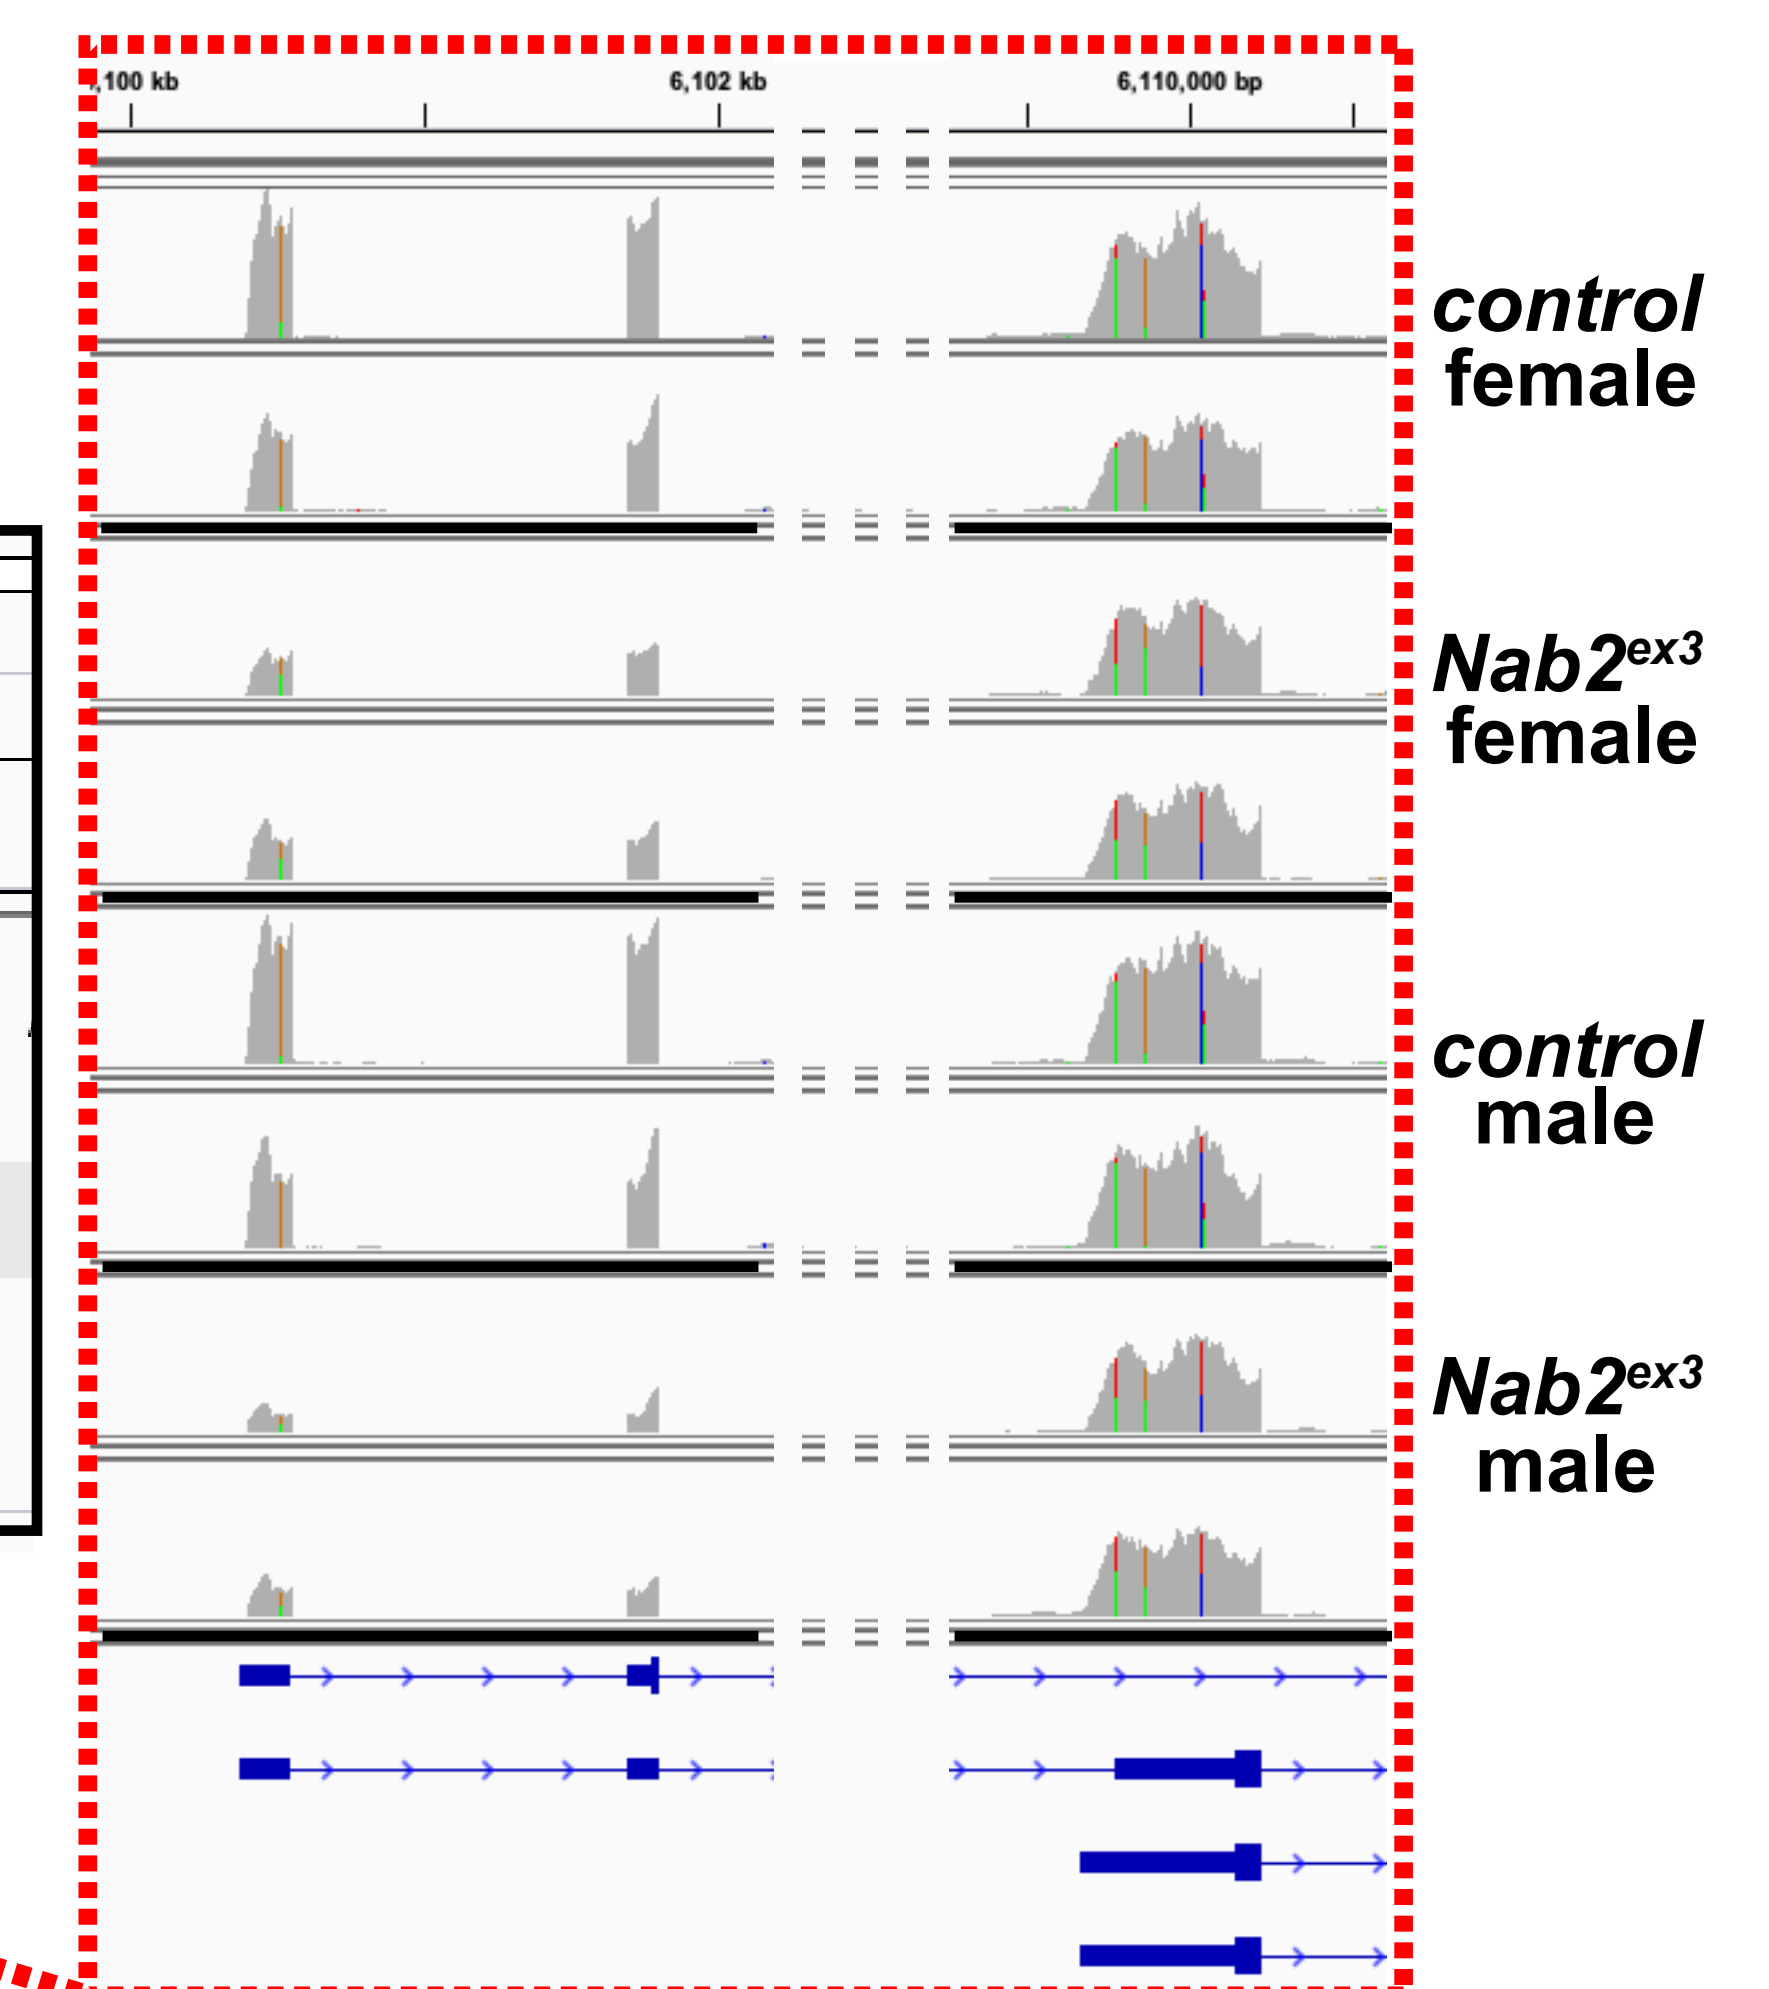

## mustard (*mtd*)

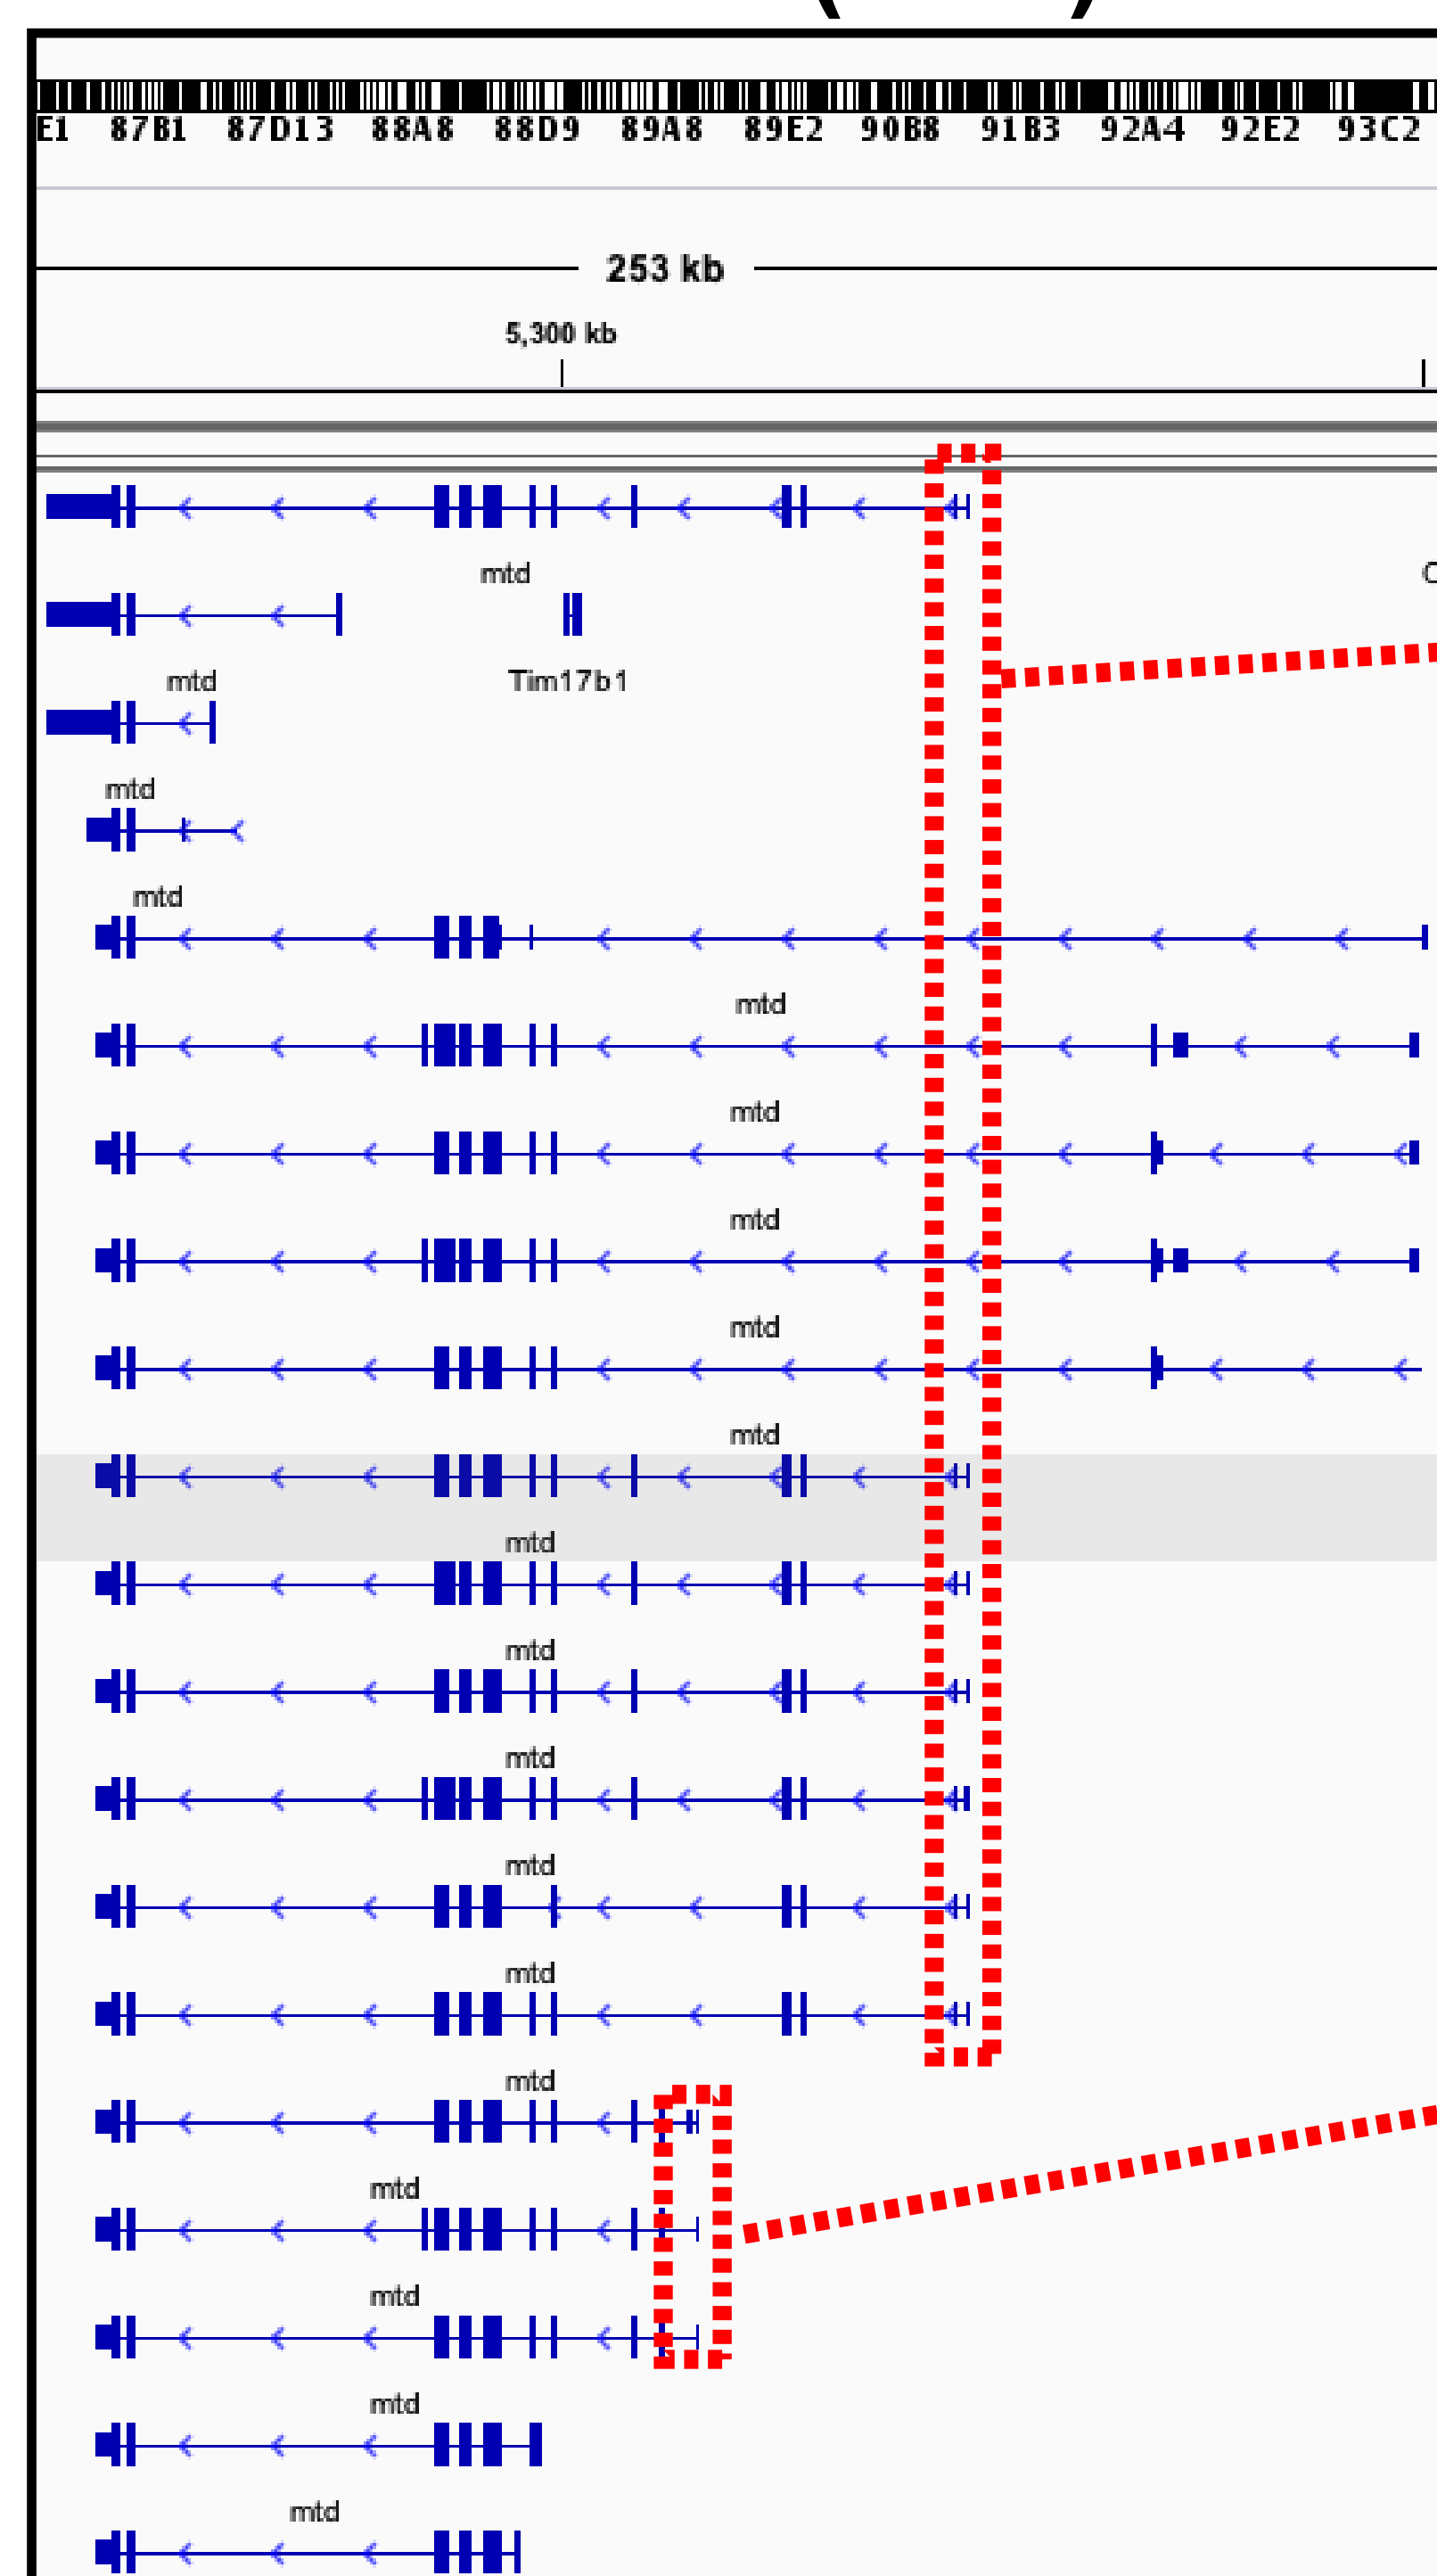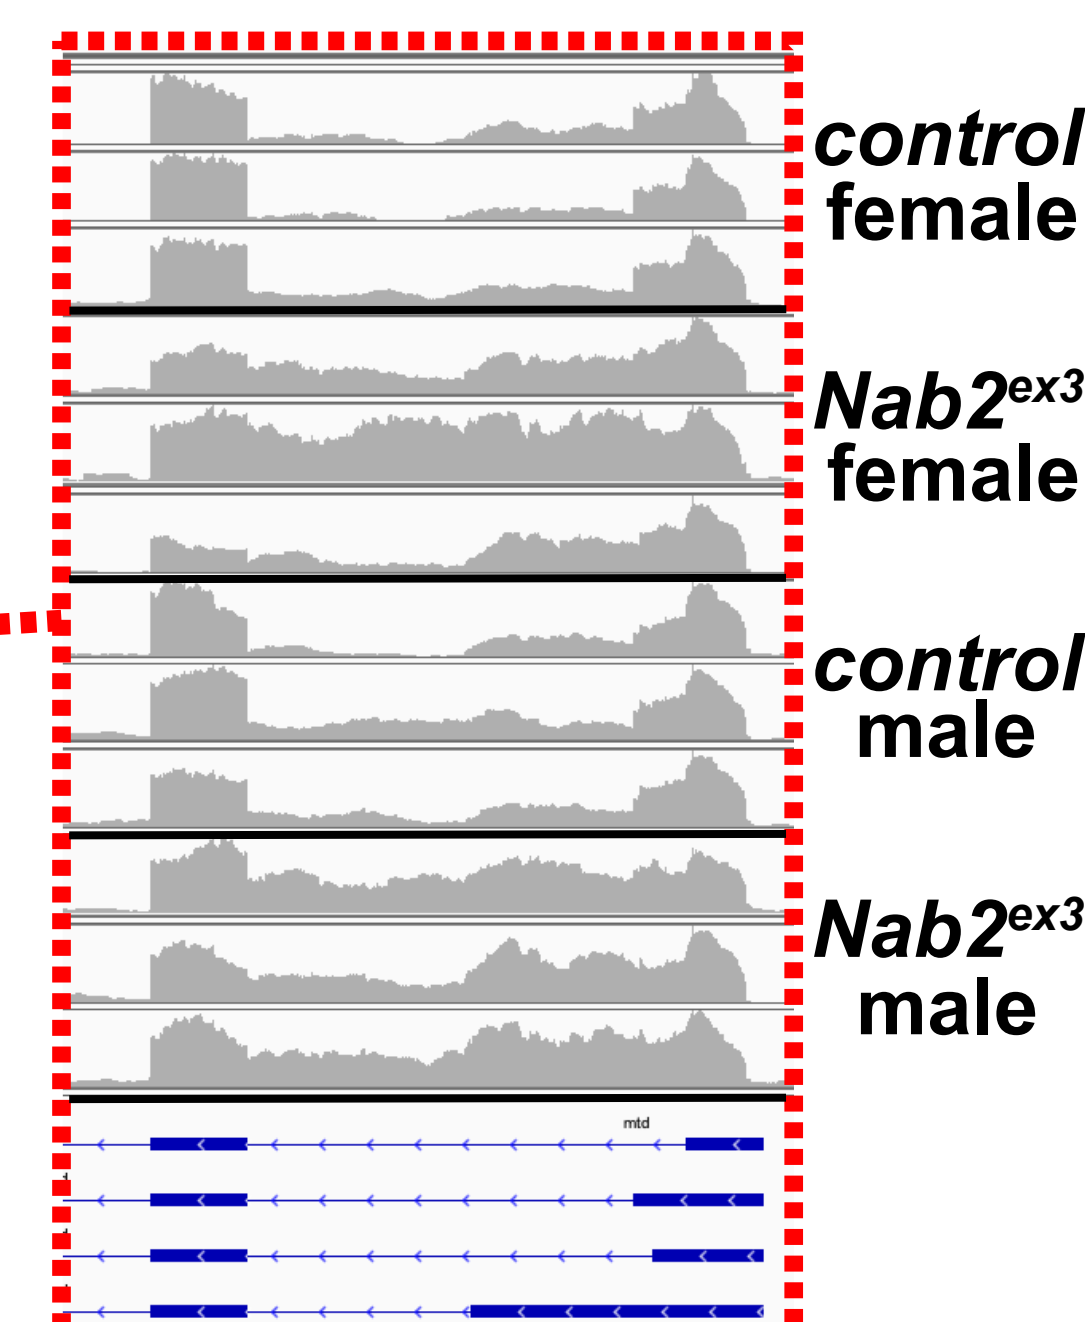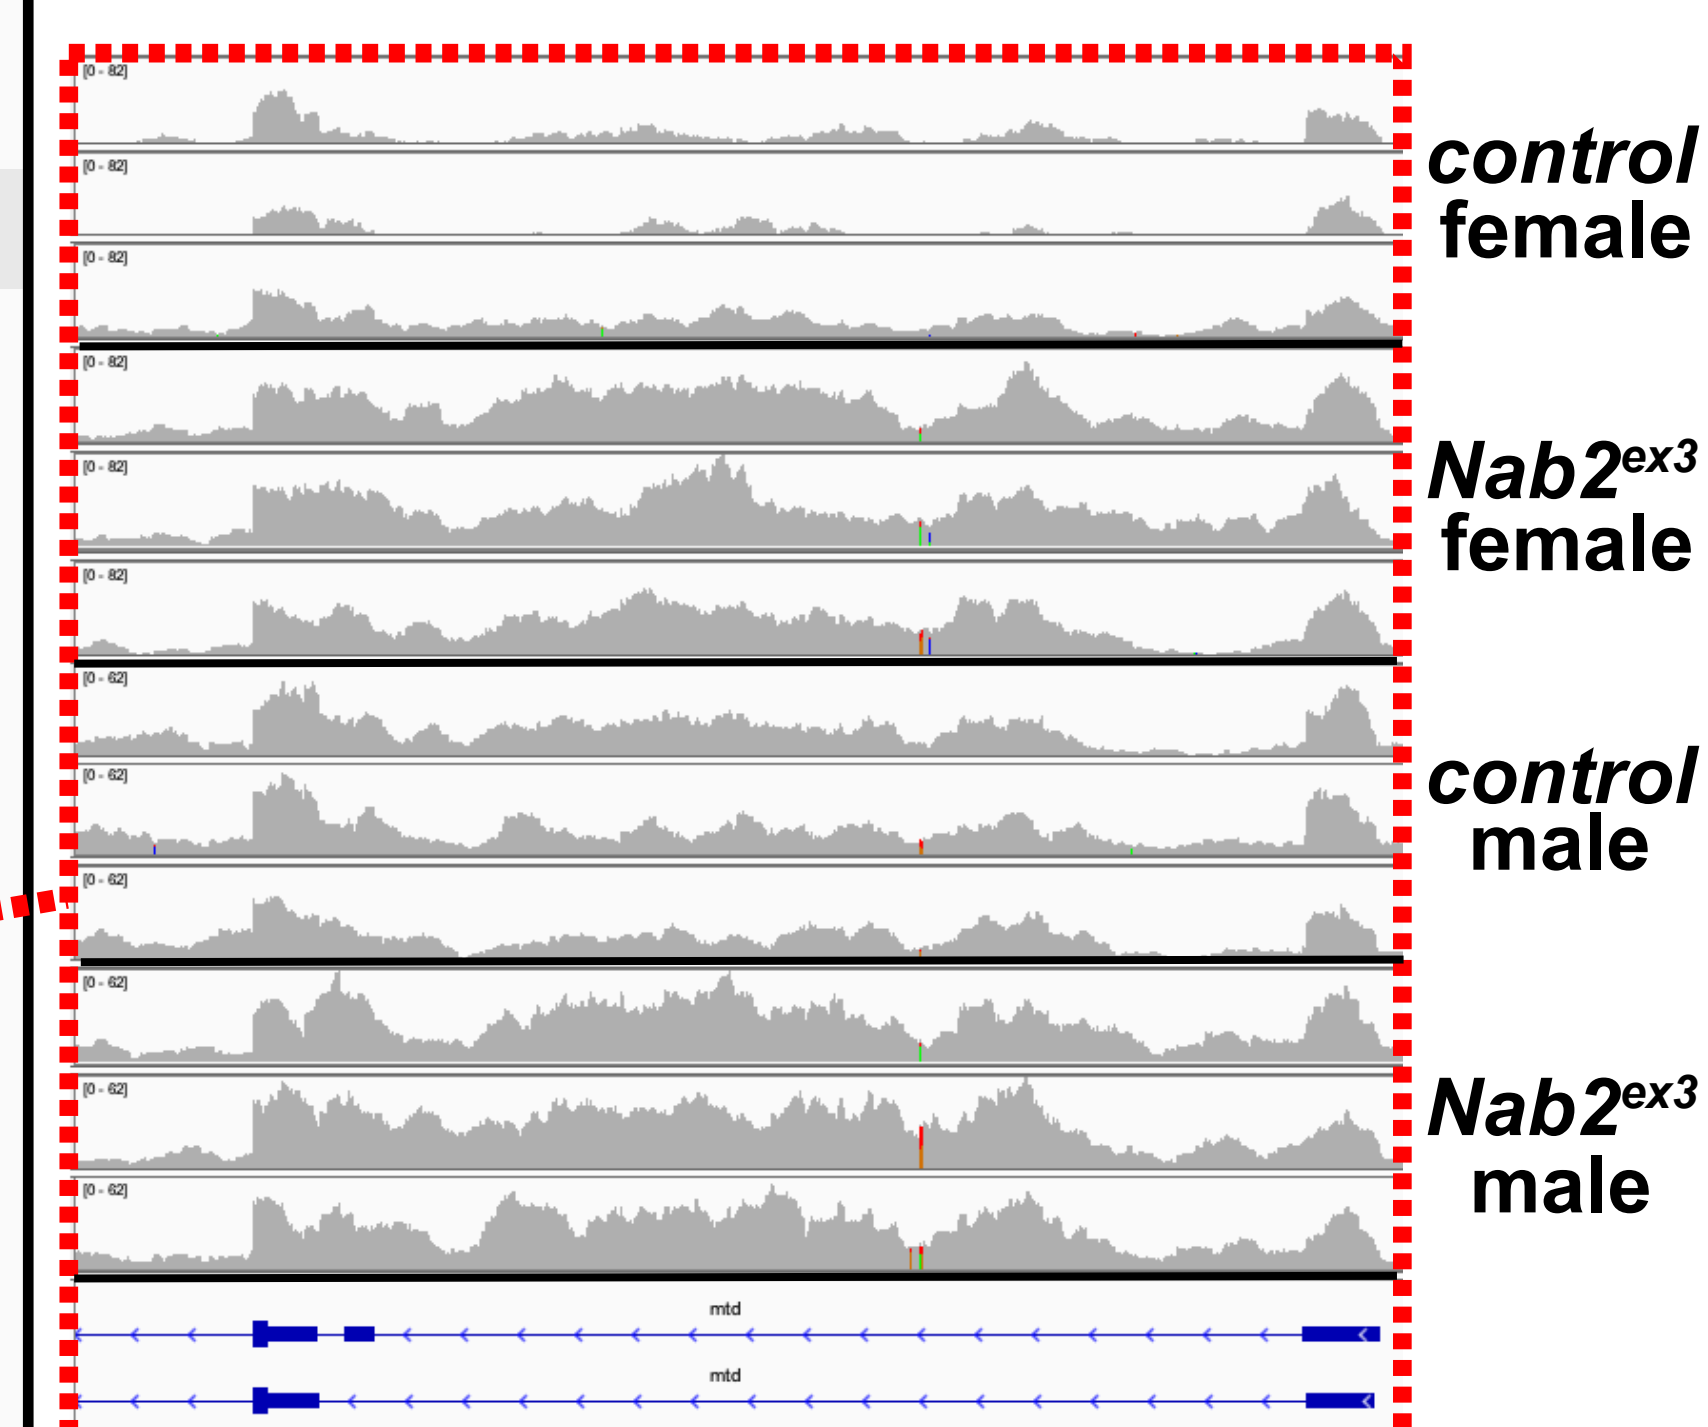

**Figure S5. (Associated with Figure 8) Nab2 loss alters structure and/or levels of the *Bsg*, *mtd* and *stai* mRNAs.** Integrated Genome Viewer (IGV) visualization of RNA-seq traces across the indicated loci in duplicate or triplicate. Dotted red boxes indicate affected introns/exons that are highlighted in paired, magnified views. Data were collected from heads of 3-day old adult male and female flies of the indicated genotypes (JALLOH et al, 2020).
